# Supplementary material
Source: publisher figshare collection journal article supplement (https://acs.figshare.com/ndownloader/files/5736957)
Supplement: Supplementary file 1 [file 5736957]

 
data_zs36 
 
_audit_creation_method            SHELXL 
_chemical_name_systematic 
; 
 ? 
; 
_chemical_name_common             ? 
_chemical_formula_moiety          ? 
_chemical_formula_structural      ? 
_chemical_formula_analytical      ? 
_chemical_formula_sum             'C31 H39 Cl2 N5 O2 S Zn' 
_chemical_formula_weight          682.00 
_chemical_melting_point           ? 
_chemical_compound_source         ? 
 
loop_ 
 _atom_type_symbol 
 _atom_type_description 
 _atom_type_scat_dispersion_real 
 _atom_type_scat_dispersion_imag 
 _atom_type_scat_source 
 'C'  'C'   0.0033   0.0016 
 'International Tables Vol C Tables 4.2.6.8 and 6.1.1.4' 
 'H'  'H'   0.0000   0.0000 
 'International Tables Vol C Tables 4.2.6.8 and 6.1.1.4' 
 'N'  'N'   0.0061   0.0033 
 'International Tables Vol C Tables 4.2.6.8 and 6.1.1.4' 
 'O'  'O'   0.0106   0.0060 
 'International Tables Vol C Tables 4.2.6.8 and 6.1.1.4' 
 'S'  'S'   0.1246   0.1234 
 'International Tables Vol C Tables 4.2.6.8 and 6.1.1.4' 
 'Cl'  'Cl'   0.1484   0.1585 
 'International Tables Vol C Tables 4.2.6.8 and 6.1.1.4' 
 'Zn'  'Zn'   0.2839   1.4301 
 'International Tables Vol C Tables 4.2.6.8 and 6.1.1.4' 
 
_symmetry_cell_setting            monoclinic 
_symmetry_space_group_name_H-M    P2(1)/c 
 
loop_ 
 _symmetry_equiv_pos_as_xyz 
 'x, y, z' 
 '-x+1/2, y+1/2, -z+1/2' 
 '-x, -y, -z' 
 'x-1/2, -y-1/2, z-1/2' 
 
_cell_length_a                    10.915(3) 
_cell_length_b                    13.024(5) 
_cell_length_c                    23.832(6) 
_cell_angle_alpha                 90.00 
_cell_angle_beta                  102.27 
_cell_angle_gamma                 90.00 
_cell_volume                      3310.5(18) 
_cell_formula_units_Z             4 
_cell_measurement_temperature     293(2) 
_cell_measurement_reflns_used     25 
_cell_measurement_theta_min       12
_cell_measurement_theta_max       12.5
 
_exptl_crystal_description        rod 
_exptl_crystal_colour             clear
_exptl_crystal_size_max           0.5
_exptl_crystal_size_mid           0.3
_exptl_crystal_size_min           0.2
_exptl_crystal_density_meas       n/a
_exptl_crystal_density_diffrn     1.368 
_exptl_crystal_density_method     n/a
_exptl_crystal_F_000              1424 
_exptl_absorpt_coefficient_mu     1.002 
_exptl_absorpt_correction_type    none
_exptl_absorpt_correction_T_min   n/a
_exptl_absorpt_correction_T_max   n/a
 
_exptl_special_details 
; 
 ? 
; 
 
_diffrn_ambient_temperature       293(2) 
_diffrn_radiation_wavelength      0.71073 
_diffrn_radiation_type            MoK\a 
_diffrn_radiation_source          'fine-focus sealed tube' 
_diffrn_radiation_monochromator   graphite 
_diffrn_measurement_device        P4
_diffrn_measurement_method        
_diffrn_standards_number          3 
_diffrn_standards_interval_count  97 
_diffrn_standards_interval_time   n/a
_diffrn_standards_decay_%         none
_diffrn_reflns_number             6096 
_diffrn_reflns_av_R_equivalents   0.0479 
_diffrn_reflns_av_sigmaI/netI     0.0340 
_diffrn_reflns_limit_h_min        0 
_diffrn_reflns_limit_h_max        12 
_diffrn_reflns_limit_k_min        -15 
_diffrn_reflns_limit_k_max        0 
_diffrn_reflns_limit_l_min        -28 
_diffrn_reflns_limit_l_max        27 
_diffrn_reflns_theta_min          1.79 
_diffrn_reflns_theta_max          25.01 
_reflns_number_total              5782 
_reflns_number_observed           4455 
_reflns_observed_criterion        >2sigma(I) 
 
_computing_data_collection        ? 
_computing_cell_refinement        ? 
_computing_data_reduction         ? 
_computing_structure_solution     'SHELXS-86 (Sheldrick, 1990)' 
_computing_structure_refinement   'SHELXL-93 (Sheldrick, 1993)' 
_computing_molecular_graphics     ? 
_computing_publication_material   ? 
 
_refine_special_details 
; 
 Refinement on F^2^ for ALL reflections except for 52 with very negative F^2^ 
 or flagged by the user for potential systematic errors.  Weighted R-factors 
 wR and all goodnesses of fit S are based on F^2^, conventional R-factors R 
 are based on F, with F set to zero for negative F^2^. The observed criterion 
 of F^2^ > 2sigma(F^2^) is used only for calculating _R_factor_obs etc. and is 
 not relevant to the choice of reflections for refinement.  R-factors based 
 on F^2^ are statistically about twice as large as those based on F, and R- 
 factors based on ALL data will be even larger. 
; 
 
_refine_ls_structure_factor_coef  Fsqd  
_refine_ls_matrix_type            full 
_refine_ls_weighting_scheme 
 'calc w=1/[\s^2^(Fo^2^)+(0.0793P)^2^+6.3191P] where P=(Fo^2^+2Fc^2^)/3' 
_atom_sites_solution_primary      direct 
_atom_sites_solution_secondary    difmap 
_atom_sites_solution_hydrogens    geom 
_refine_ls_hydrogen_treatment     riding
_refine_ls_extinction_method      none 
_refine_ls_extinction_coef        none
_refine_ls_number_reflns          5730 
_refine_ls_number_parameters      379 
_refine_ls_number_restraints      0 
_refine_ls_R_factor_all           0.0796 
_refine_ls_R_factor_obs           0.0563 
_refine_ls_wR_factor_all          0.2345 
_refine_ls_wR_factor_obs          0.1446 
_refine_ls_goodness_of_fit_all    1.031 
_refine_ls_goodness_of_fit_obs    1.025 
_refine_ls_restrained_S_all       1.465 
_refine_ls_restrained_S_obs       1.025 
_refine_ls_shift/esd_max          -0.049 
_refine_ls_shift/esd_mean         0.001 
 
loop_ 
 _atom_site_label 
 _atom_site_type_symbol 
 _atom_site_fract_x 
 _atom_site_fract_y 
 _atom_site_fract_z 
 _atom_site_U_iso_or_equiv 
 _atom_site_thermal_displace_type 
 _atom_site_occupancy 
 _atom_site_calc_flag 
 _atom_site_refinement_flags 
 _atom_site_disorder_group 
Zn1 Zn 0.38888(4) 0.75945(3) 0.16328(2) 0.0381(2) Uani 1 d . . 
S1 S 0.51553(12) 0.73796(11) 0.10262(5) 0.0576(3) Uani 1 d . . 
O1 O 0.2133(3) 0.7652(3) 0.13710(12) 0.0522(8) Uani 1 d . . 
N1 N 0.4069(3) 0.8781(2) 0.22017(14) 0.0404(8) Uani 1 d . . 
N2 N 0.3408(3) 0.8677(2) 0.26207(13) 0.0342(7) Uani 1 d . . 
N3 N 0.4053(3) 0.6605(2) 0.22990(15) 0.0397(8) Uani 1 d . . 
N4 N 0.3391(3) 0.6846(2) 0.27045(14) 0.0365(7) Uani 1 d . . 
N5 N 0.5285(4) 0.6883(3) -0.0148(2) 0.0565(10) Uani 1 d . . 
H5A H 0.5391(4) 0.6503(3) 0.0174(2) 0.080 Uiso 1 d R . 
O2 O 0.5722(5) 0.6872(4) -0.1026(2) 0.101(2) Uani 1 d . . 
C1 C 0.3035(5) 0.9587(4) 0.3488(2) 0.0564(12) Uani 1 d . . 
H1A H 0.2499(5) 0.9011(4) 0.3509(2) 0.080 Uiso 1 d R . 
H1B H 0.3687(5) 0.9612(4) 0.3829(2) 0.080 Uiso 1 d R . 
H1C H 0.2553(5) 1.0209(4) 0.3456(2) 0.080 Uiso 1 d R . 
C2 C 0.3612(4) 0.9485(3) 0.2982(2) 0.0401(9) Uani 1 d . . 
C3 C 0.4424(4) 1.0115(3) 0.2786(2) 0.0463(10) Uani 1 d . . 
H3A H 0.4738(4) 1.0760(3) 0.2952(2) 0.080 Uiso 1 d R . 
C4 C 0.4690(4) 0.9659(3) 0.2310(2) 0.0432(10) Uani 1 d . . 
C5 C 0.5543(5) 1.0015(4) 0.1934(2) 0.0639(14) Uani 1 d . . 
H5B H 0.5542(5) 0.9517(4) 0.1637(2) 0.080 Uiso 1 d R . 
H5C H 0.5243(5) 1.0660(4) 0.1764(2) 0.080 Uiso 1 d R . 
H5D H 0.6381(5) 1.0098(4) 0.2155(2) 0.080 Uiso 1 d R . 
C6 C 0.2960(5) 0.6182(4) 0.3628(2) 0.0679(14) Uani 1 d . . 
H6A H 0.2448(5) 0.6788(4) 0.3596(2) 0.080 Uiso 1 d R . 
H6B H 0.2446(5) 0.5587(4) 0.3638(2) 0.080 Uiso 1 d R . 
H6C H 0.3595(5) 0.6215(4) 0.3975(2) 0.080 Uiso 1 d R . 
C7 C 0.3569(4) 0.6132(3) 0.3129(2) 0.0452(10) Uani 1 d . . 
C8 C 0.4369(4) 0.5424(3) 0.2981(2) 0.0510(11) Uani 1 d . . 
H8A H 0.4671(4) 0.4813(3) 0.3191(2) 0.080 Uiso 1 d R . 
C9 C 0.4659(4) 0.5743(3) 0.2476(2) 0.0464(10) Uani 1 d . . 
C10 C 0.5506(5) 0.5276(4) 0.2137(2) 0.0617(13) Uani 1 d . . 
H10A H 0.5503(5) 0.5696(4) 0.1806(2) 0.080 Uiso 1 d R . 
H10B H 0.6343(5) 0.5235(4) 0.2365(2) 0.080 Uiso 1 d R . 
H10C H 0.5215(5) 0.4599(4) 0.2016(2) 0.080 Uiso 1 d R . 
C11 C 0.2627(3) 0.7781(3) 0.2663(2) 0.0352(8) Uani 1 d . . 
H11A H 0.2414(3) 0.7844(3) 0.3032(2) 0.080 Uiso 1 d R . 
C12 C 0.1382(4) 0.7729(3) 0.2242(2) 0.0340(8) Uani 1 d . . 
C13 C 0.0348(4) 0.7728(3) 0.2506(2) 0.0389(9) Uani 1 d . . 
H13A H 0.0492(4) 0.7768(3) 0.2917(2) 0.080 Uiso 1 d R . 
C14 C -0.0860(4) 0.7686(3) 0.2192(2) 0.0426(9) Uani 1 d . . 
C15 C -0.1952(4) 0.7662(4) 0.2483(2) 0.0587(12) Uani 1 d . . 
H15A H -0.1642(4) 0.7684(4) 0.2891(2) 0.080 Uiso 1 d R . 
H15B H -0.2477(4) 0.8248(4) 0.2365(2) 0.080 Uiso 1 d R . 
H15C H -0.2429(4) 0.7045(4) 0.2382(2) 0.080 Uiso 1 d R . 
C16 C -0.1026(4) 0.7659(3) 0.1602(2) 0.0447(10) Uani 1 d . . 
H16A H -0.1863(4) 0.7640(3) 0.1373(2) 0.080 Uiso 1 d R . 
C17 C -0.0043(4) 0.7663(3) 0.1316(2) 0.0403(9) Uani 1 d . . 
C18 C -0.0296(5) 0.7668(4) 0.0660(2) 0.0542(11) Uani 1 d . . 
C19 C -0.1695(5) 0.7624(5) 0.0396(2) 0.072(2) Uani 1 d . . 
H19A H -0.2052(5) 0.7015(5) 0.0522(2) 0.080 Uiso 1 d R . 
H19B H -0.2099(5) 0.8218(5) 0.0512(2) 0.080 Uiso 1 d R . 
H19C H -0.1812(5) 0.7615(5) -0.0014(2) 0.080 Uiso 1 d R . 
C20 C 0.0227(5) 0.8645(5) 0.0451(2) 0.075(2) Uani 1 d . . 
H20A H 0.0066(5) 0.8641(5) 0.0039(2) 0.080 Uiso 1 d R . 
H20B H -0.0170(5) 0.9232(5) 0.0579(2) 0.080 Uiso 1 d R . 
H20C H 0.1115(5) 0.8678(5) 0.0602(2) 0.080 Uiso 1 d R . 
C21 C 0.0296(6) 0.6724(5) 0.0437(2) 0.079(2) Uani 1 d . . 
H21A H -0.0036(6) 0.6110(5) 0.0572(2) 0.080 Uiso 1 d R . 
H21B H 0.0118(6) 0.6725(5) 0.0025(2) 0.080 Uiso 1 d R . 
H21C H 0.1187(6) 0.6747(5) 0.0581(2) 0.080 Uiso 1 d R . 
C22 C 0.1207(4) 0.7683(3) 0.1644(2) 0.0377(9) Uani 1 d . . 
C23 C 0.4464(4) 0.8111(4) 0.0419(2) 0.0512(11) Uani 1 d . . 
C24 C 0.3777(5) 0.8993(4) 0.0451(3) 0.0698(15) Uani 1 d . . 
H24A H 0.3667(5) 0.9215(4) 0.0821(3) 0.080 Uiso 1 d R . 
C25 C 0.3299(6) 0.9554(5) -0.0027(3) 0.091(2) Uani 1 d . . 
H25A H 0.2800(6) 1.0150(5) 0.0005(3) 0.080 Uiso 1 d R . 
C26 C 0.3501(7) 0.9263(6) -0.0549(3) 0.097(2) Uani 1 d . . 
H26A H 0.3142(7) 0.9647(6) -0.0888(3) 0.080 Uiso 1 d R . 
C27 C 0.4164(6) 0.8400(5) -0.0598(2) 0.080(2) Uani 1 d . . 
H27A H 0.4343(6) 0.8218(5) -0.0962(2) 0.080 Uiso 1 d R . 
C28 C 0.4649(4) 0.7807(4) -0.0120(2) 0.0554(12) Uani 1 d . . 
C29 C 0.5754(5) 0.6459(5) -0.0573(2) 0.0661(14) Uani 1 d . . 
C30 C 0.6344(6) 0.5443(5) -0.0431(3) 0.079(2) Uani 1 d . . 
H30A H 0.6659(6) 0.5201(5) -0.0753(3) 0.080 Uiso 1 d R . 
H30B H 0.7025(6) 0.5511(5) -0.0104(3) 0.080 Uiso 1 d R . 
H30C H 0.5743(6) 0.4963(5) -0.0345(3) 0.080 Uiso 1 d R . 
Cl2 Cl 0.0991(2) 0.7210(2) -0.13379(14) 0.1423(10) Uani 1 d . . 
C31 C 0.1824(10) 0.6270(11) -0.0878(4) 0.206(7) Uani 1 d . . 
H31A H 0.1289(10) 0.5999(11) -0.0642(4) 0.080 Uiso 1 d R . 
H31B H 0.2509(10) 0.6614(11) -0.0629(4) 0.080 Uiso 1 d R . 
Cl1 Cl 0.2425(3) 0.5327(3) -0.11734(12) 0.1754(13) Uani 1 d . . 
 
loop_ 
 _atom_site_aniso_label 
 _atom_site_aniso_U_11 
 _atom_site_aniso_U_22 
 _atom_site_aniso_U_33 
 _atom_site_aniso_U_23 
 _atom_site_aniso_U_13 
 _atom_site_aniso_U_12 
Zn1 0.0380(3) 0.0413(3) 0.0361(3) -0.0002(2) 0.0107(2) 0.0024(2) 
S1 0.0506(7) 0.0865(9) 0.0389(6) 0.0041(6) 0.0164(5) 0.0213(6) 
O1 0.036(2) 0.086(2) 0.0342(15) 0.0008(15) 0.0057(12) 0.0026(15) 
N1 0.044(2) 0.037(2) 0.044(2) -0.0004(14) 0.015(2) -0.0051(15) 
N2 0.036(2) 0.032(2) 0.036(2) -0.0012(13) 0.0090(14) -0.0030(13) 
N3 0.043(2) 0.031(2) 0.046(2) 0.0025(14) 0.010(2) 0.0031(14) 
N4 0.039(2) 0.032(2) 0.038(2) 0.0034(13) 0.0071(14) 0.0001(14) 
N5 0.063(3) 0.069(3) 0.041(2) 0.000(2) 0.018(2) -0.007(2) 
O2 0.146(4) 0.116(4) 0.054(2) 0.005(2) 0.049(3) 0.011(3) 
C1 0.064(3) 0.055(3) 0.053(3) -0.018(2) 0.019(2) -0.002(2) 
C2 0.040(2) 0.035(2) 0.043(2) -0.003(2) 0.002(2) 0.002(2) 
C3 0.049(3) 0.031(2) 0.055(3) -0.003(2) 0.004(2) -0.003(2) 
C4 0.037(2) 0.033(2) 0.058(3) 0.005(2) 0.008(2) -0.003(2) 
C5 0.063(3) 0.054(3) 0.081(4) 0.004(3) 0.029(3) -0.017(2) 
C6 0.077(4) 0.074(3) 0.055(3) 0.026(3) 0.019(3) 0.005(3) 
C7 0.050(3) 0.041(2) 0.042(2) 0.009(2) 0.001(2) -0.008(2) 
C8 0.053(3) 0.035(2) 0.059(3) 0.011(2) 0.000(2) 0.003(2) 
C9 0.041(2) 0.032(2) 0.062(3) 0.002(2) 0.002(2) 0.001(2) 
C10 0.058(3) 0.043(3) 0.084(4) 0.002(2) 0.017(3) 0.012(2) 
C11 0.033(2) 0.033(2) 0.039(2) 0.002(2) 0.007(2) -0.002(2) 
C12 0.035(2) 0.029(2) 0.039(2) 0.0009(15) 0.008(2) -0.0001(15) 
C13 0.041(2) 0.030(2) 0.047(2) -0.002(2) 0.012(2) 0.000(2) 
C14 0.040(2) 0.032(2) 0.058(3) -0.001(2) 0.014(2) 0.001(2) 
C15 0.043(3) 0.061(3) 0.075(3) 0.000(2) 0.020(2) -0.002(2) 
C16 0.036(2) 0.035(2) 0.059(3) 0.004(2) 0.001(2) 0.002(2) 
C17 0.038(2) 0.036(2) 0.045(2) 0.004(2) 0.002(2) 0.001(2) 
C18 0.051(3) 0.064(3) 0.041(2) 0.004(2) -0.005(2) -0.003(2) 
C19 0.057(3) 0.097(4) 0.051(3) 0.008(3) -0.013(2) -0.007(3) 
C20 0.068(3) 0.095(4) 0.055(3) 0.025(3) 0.000(3) -0.017(3) 
C21 0.082(4) 0.100(5) 0.047(3) -0.018(3) -0.004(3) 0.009(3) 
C22 0.038(2) 0.034(2) 0.039(2) 0.003(2) 0.005(2) 0.001(2) 
C23 0.043(2) 0.064(3) 0.049(3) 0.007(2) 0.015(2) -0.004(2) 
C24 0.071(4) 0.075(4) 0.070(4) 0.014(3) 0.031(3) 0.014(3) 
C25 0.084(4) 0.088(4) 0.109(5) 0.037(4) 0.038(4) 0.022(4) 
C26 0.093(5) 0.115(6) 0.087(5) 0.054(4) 0.025(4) 0.020(4) 
C27 0.092(4) 0.099(5) 0.054(3) 0.021(3) 0.022(3) -0.003(4) 
C28 0.049(3) 0.071(3) 0.048(3) 0.010(2) 0.014(2) -0.012(2) 
C29 0.074(4) 0.084(4) 0.046(3) -0.010(3) 0.023(3) -0.021(3) 
C30 0.102(5) 0.080(4) 0.065(4) -0.009(3) 0.037(3) -0.003(3) 
Cl2 0.0889(14) 0.131(2) 0.183(3) 0.004(2) -0.0250(15) 0.0057(13) 
C31 0.124(8) 0.387(22) 0.089(7) -0.027(10) -0.016(6) 0.072(11) 
Cl1 0.181(3) 0.206(3) 0.126(2) -0.013(2) 0.001(2) 0.068(3) 
 
_geom_special_details 
; 
 All esds (except the esd in the dihedral angle between two l.s. planes) 
 are estimated using the full covariance matrix.  The cell esds are taken 
 into account individually in the estimation of esds in distances, angles 
 and torsion angles; correlations between esds in cell parameters are only 
 used when they are defined by crystal symmetry.  An approximate (isotropic) 
 treatment of cell esds is used for estimating esds involving l.s. planes. 
; 
 
loop_ 
 _geom_bond_atom_site_label_1 
 _geom_bond_atom_site_label_2 
 _geom_bond_distance 
 _geom_bond_site_symmetry_2 
 _geom_bond_publ_flag 
Zn1 O1 1.887(3) . ? 
Zn1 N3 2.023(3) . ? 
Zn1 N1 2.037(3) . ? 
Zn1 S1 2.2201(13) . ? 
S1 C23 1.762(5) . ? 
O1 C22 1.313(5) . ? 
N1 C4 1.327(5) . ? 
N1 N2 1.358(5) . ? 
N2 C2 1.349(5) . ? 
N2 C11 1.461(5) . ? 
N3 C9 1.325(5) . ? 
N3 N4 1.362(5) . ? 
N4 C7 1.357(5) . ? 
N4 C11 1.467(5) . ? 
N5 C29 1.346(6) . ? 
N5 C28 1.398(7) . ? 
O2 C29 1.200(6) . ? 
C1 C2 1.480(6) . ? 
C2 C3 1.361(6) . ? 
C3 C4 1.367(6) . ? 
C4 C5 1.496(6) . ? 
C6 C7 1.483(7) . ? 
C7 C8 1.367(6) . ? 
C8 C9 1.374(6) . ? 
C9 C10 1.481(7) . ? 
C11 C12 1.509(5) . ? 
C12 C22 1.400(6) . ? 
C12 C13 1.404(6) . ? 
C13 C14 1.372(6) . ? 
C14 C16 1.380(6) . ? 
C14 C15 1.501(6) . ? 
C16 C17 1.388(6) . ? 
C17 C22 1.421(6) . ? 
C17 C18 1.528(6) . ? 
C18 C21 1.535(8) . ? 
C18 C20 1.522(7) . ? 
C18 C19 1.523(7) . ? 
C23 C24 1.383(7) . ? 
C23 C28 1.401(7) . ? 
C24 C25 1.361(8) . ? 
C25 C26 1.364(10) . ? 
C26 C27 1.354(9) . ? 
C27 C28 1.384(7) . ? 
C29 C30 1.479(8) . ? 
Cl2 C31 1.762(11) . ? 
C31 Cl1 1.622(12) . ? 
 
loop_ 
 _geom_angle_atom_site_label_1 
 _geom_angle_atom_site_label_2 
 _geom_angle_atom_site_label_3 
 _geom_angle 
 _geom_angle_site_symmetry_1 
 _geom_angle_site_symmetry_3 
 _geom_angle_publ_flag 
O1 Zn1 N3 101.50(14) . . ? 
O1 Zn1 N1 97.91(14) . . ? 
N3 Zn1 N1 88.92(13) . . ? 
O1 Zn1 S1 121.27(10) . . ? 
N3 Zn1 S1 117.83(10) . . ? 
N1 Zn1 S1 122.92(10) . . ? 
C23 S1 Zn1 104.4(2) . . ? 
C22 O1 Zn1 132.3(3) . . ? 
C4 N1 N2 105.9(3) . . ? 
C4 N1 Zn1 139.1(3) . . ? 
N2 N1 Zn1 115.0(2) . . ? 
C2 N2 N1 110.5(3) . . ? 
C2 N2 C11 126.8(3) . . ? 
N1 N2 C11 122.6(3) . . ? 
C9 N3 N4 106.0(3) . . ? 
C9 N3 Zn1 138.1(3) . . ? 
N4 N3 Zn1 116.0(2) . . ? 
C7 N4 N3 110.9(3) . . ? 
C7 N4 C11 127.5(3) . . ? 
N3 N4 C11 121.6(3) . . ? 
C29 N5 C28 131.4(4) . . ? 
N2 C2 C3 106.4(4) . . ? 
N2 C2 C1 123.3(4) . . ? 
C3 C2 C1 130.2(4) . . ? 
C2 C3 C4 107.0(4) . . ? 
N1 C4 C3 110.2(4) . . ? 
N1 C4 C5 120.6(4) . . ? 
C3 C4 C5 129.2(4) . . ? 
N4 C7 C8 105.7(4) . . ? 
N4 C7 C6 123.3(4) . . ? 
C8 C7 C6 131.0(4) . . ? 
C7 C8 C9 107.4(4) . . ? 
N3 C9 C8 110.0(4) . . ? 
N3 C9 C10 120.1(4) . . ? 
C8 C9 C10 129.8(4) . . ? 
N2 C11 N4 109.6(3) . . ? 
N2 C11 C12 116.5(3) . . ? 
N4 C11 C12 115.3(3) . . ? 
C22 C12 C13 120.5(4) . . ? 
C22 C12 C11 126.0(3) . . ? 
C13 C12 C11 113.5(3) . . ? 
C14 C13 C12 121.8(4) . . ? 
C13 C14 C16 117.4(4) . . ? 
C13 C14 C15 120.9(4) . . ? 
C16 C14 C15 121.7(4) . . ? 
C14 C16 C17 123.6(4) . . ? 
C16 C17 C22 118.8(4) . . ? 
C16 C17 C18 120.8(4) . . ? 
C22 C17 C18 120.4(4) . . ? 
C21 C18 C17 110.6(4) . . ? 
C21 C18 C20 110.0(5) . . ? 
C17 C18 C20 109.8(4) . . ? 
C21 C18 C19 106.6(4) . . ? 
C17 C18 C19 111.7(4) . . ? 
C20 C18 C19 108.0(4) . . ? 
O1 C22 C12 123.6(4) . . ? 
O1 C22 C17 118.5(4) . . ? 
C12 C22 C17 117.9(4) . . ? 
C24 C23 C28 118.1(5) . . ? 
C24 C23 S1 123.1(4) . . ? 
C28 C23 S1 118.7(4) . . ? 
C25 C24 C23 121.1(6) . . ? 
C26 C25 C24 120.5(6) . . ? 
C25 C26 C27 120.1(6) . . ? 
C26 C27 C28 120.8(6) . . ? 
C27 C28 N5 123.3(5) . . ? 
C27 C28 C23 119.5(5) . . ? 
N5 C28 C23 117.2(4) . . ? 
O2 C29 N5 123.3(6) . . ? 
O2 C29 C30 122.4(5) . . ? 
N5 C29 C30 114.3(5) . . ? 
Cl1 C31 Cl2 117.3(6) . . ? 
 
_refine_diff_density_max    0.847 
_refine_diff_density_min   -0.792 
_refine_diff_density_rms    0.098 
